# Supplementary material for: Vaccine Acceptance and Hesitancy among Hospitalized COVID-19 Patients in Punjab, Pakistan
Source: MDPI journal article supplement (doi:10.3390/vaccines10101640), 2022-09-30
Supplement: s1 [file s1]

**Table S1: KMO and Bartlett's Test**

|                                                         |                    |          |
|---------------------------------------------------------|--------------------|----------|
| <b>Kaiser-Meyer-Olkin Measure of Sampling Adequacy.</b> |                    | 0.941    |
| <b>Bartlett's Test of Sphericity</b>                    | Approx. Chi-Square | 6069.913 |
|                                                         | df                 | 55       |
|                                                         | Sig.               | 0.000    |

**Table S2: Factors loading**

|                                                                                                                                  | Factor                               |                        |
|----------------------------------------------------------------------------------------------------------------------------------|--------------------------------------|------------------------|
|                                                                                                                                  | Hesitancy in receiving COVID vaccine | Trust on COVID vaccine |
| <b>Questionnaire items</b>                                                                                                       |                                      |                        |
| I want to take the COVID vaccine because the vaccine is an effective way of protecting people from COVID infection               | <b>0.885</b>                         | 0.353                  |
| I want to take the COVID vaccine because the vaccine is important for my health and the health of my family and friends          | <b>0.904</b>                         | 0.348                  |
| I want to take the COVID vaccine because all COVID vaccines offered by the government are beneficial                             | <b>0.793</b>                         | 0.432                  |
| I want to take the COVID vaccine because the vaccine lowers the risk of COVID infection                                          | <b>0.906</b>                         | 0.317                  |
| I want to take the COVID vaccine because vaccines prevent COVID infection from becoming worse, and the need for hospitalization  | <b>0.896</b>                         | 0.336                  |
| I want to take the COVID vaccine because the vaccine is a more effective preventive measure than using natural or other remedies | <b>0.788</b>                         | 0.404                  |
| I want to take the COVID vaccine because COVID vaccines are as safe as other vaccines (e.g., flu vaccine)                        | <b>0.903</b>                         | 0.348                  |
| I want to take the COVID vaccine because all COVID vaccines offered by the government are safe                                   | <b>0.644</b>                         | 0.494                  |
| I trust COVID vaccines because the benefits of the COVID vaccine outweigh their risk                                             | 0.461                                | <b>0.753</b>           |
| I trust COVID vaccines because there are not many adverse effects reported for the COVID vaccine                                 | 0.295                                | <b>0.902</b>           |
| I trust COVID vaccines because sufficient information is available about the long-term safety and efficacy of COVID vaccines     | 0.328                                | <b>0.881</b>           |

Extraction Method: Principal Component Analysis.

Rotation Method: Varimax with Kaiser Normalization.

a. Rotation converged in 3 iterations.

**Table S3:** Agreement or disagreement to study questionnaire items by vaccination status

| Items                                                                                                                                       | Non-vaccinated COVID patients |                       | Vaccinated COVID patients |                       | p-value |
|---------------------------------------------------------------------------------------------------------------------------------------------|-------------------------------|-----------------------|---------------------------|-----------------------|---------|
|                                                                                                                                             | Agreement<br>n (%)            | Disagreement<br>n (%) | Agreement<br>n (%)        | Disagreement<br>n (%) |         |
| 1. I want to take the COVID vaccine because the vaccine is an effective way of protecting people from COVID infection (n=380)               | 188 (49.5)                    | 131 (34.5)            | 26 (6.8)                  | 35 (9.2)              | 0.019   |
| 2. I want to take the COVID vaccine because the vaccine is important for my health and the health of my family and friends (n=382)          | 194 (50.8)                    | 126 (33.0)            | 28 (7.3)                  | 34 (8.9)              | 0.024   |
| 3. I want to take the COVID vaccine because all COVID vaccines offered by the government are beneficial (n=377)                             | 165 (43.8)                    | 150 (37.8)            | 25 (6.6)                  | 37 (9.8)              | 0.083   |
| 4. I want to take the COVID vaccine because the vaccine lowers the risk of COVID infection (n=383)                                          | 195 (50.9)                    | 126 (32.9)            | 27 (7.1)                  | 35 (9.1)              | 0.012   |
| 5. I want to take the COVID vaccine because vaccines prevent COVID infection from becoming worse and the need for hospitalization (n=382)   | 195 (51.0)                    | 124 (32.5)            | 28 (7.3)                  | 35 (9.2)              | 0.014   |
| 6. I want to take the COVID vaccine because the vaccine is a more effective preventive measure than using natural or other remedies (n=381) | 163 (42.8)                    | 155 (40.7)            | 24 (6.3)                  | 39 (10.2)             | 0.056   |
| 7. I want to take the COVID vaccine because COVID vaccines are as safe as other vaccines (e.g., flu vaccine) (n=383)                        | 192 (50.1)                    | 128 (33.4)            | 29 (7.6)                  | 34 (8.9)              | 0.040   |
| 8. I want to take the COVID vaccine because all COVID vaccines offered by the government are safe (n=379)                                   | 148 (39.1)                    | 168 (44.3)            | 24 (6.3)                  | 39 (10.3)             | 0.203   |
| 9. I trust COVID vaccines because the benefits of the COVID vaccine outweigh their risk (n=378)                                             | 156 (41.3)                    | 159 (42.1)            | 23 (6.1)                  | 40 (10.6)             | 0.059   |
| 10. I trust COVID vaccines because there are not many adverse effects reported for the COVID vaccine (n=376)                                | 141 (37.5)                    | 174 (46.3)            | 31 (8.2)                  | 30 (8.0)              | 0.385   |
| 11. I trust COVID vaccines because sufficient information is available about the long-term safety and efficacy of COVID vaccines (n=376)    | 134 (35.6)                    | 175 (46.5)            | 32 (8.5)                  | 29 (7.7)              | 0.192   |

Agreement = strongly agree or agree; disagreement=strongly disagree and disagree

**Table S4:** COVID-19 vaccines approved and available in Pakistan

| <b>Name of vaccine</b> | <b>Source</b>        | <b>Date available in Pakistan for public use</b> |
|------------------------|----------------------|--------------------------------------------------|
| Sinopharm              | China                | 01-Feb-2021                                      |
| Sinovac                | China                | 23-May-2021                                      |
| CanSino                | China                | 31-Mar-2021                                      |
| Oxford-AstraZeneca     | WHO COVAX            | 08-May-2021                                      |
| Pfizer                 | WHO COVAX            | 27-Aug-2021                                      |
| Moderna                | WHO COVAX            | 04-Jul-2021                                      |
| Pakvac                 | Locally manufactured | 02-Jun-2021                                      |
| Sputnik V              | Russia               | 03-Apr-2021                                      |
